# Supplementary material for: Synthesis and electronic investigation of mono- and di-substituted 4-nitro- and 4-amino-pyrazol-1-yl bis(pyrazol-1-yl)pyridine-type ligands and luminescent Eu(iii) derivatives
Source: Royal Society of Chemistry journal article supplement (doi:10.1039/c7dt01153a), 2017-01-01
Supplement: c7dt01153a1.pdf [file c7dt01153a1.pdf]

## Supplementary Information (SI) for:

### Synthesis and Electronic Investigation of Mono- and Di-substituted 4-Nitro- and 4-Amino-pyrazol-1-yl Bis(pyrazol-1-yl)pyridine-type Ligands and Luminescent Eu(III) Derivatives

Daniel J. Strohecker, Vincent M. Lynch, Bradley J. Holliday and Richard A. Jones

Department of Chemistry, University of Texas at Austin, 105 E. 24th St. Stop A5300 Austin, TX 78712-1224, United States of America

## Table of Contents

|                                                                                                                                                         |    |
|---------------------------------------------------------------------------------------------------------------------------------------------------------|----|
| Figure S1: 77 K excitation and emission spectra of 2 in EEET with fitting of emission spectrum peaks .....                                              | 3  |
| Figure S2: Eu(III) luminescence decays and bi-exponential fits of compounds 7 (top) and 8 (bottom) in DCM solution (left) and solid state (right) ..... | 4  |
| Table S1. Emissive $\tau_{\text{obs}}$ components of 7 and 8 and the respective contributions of each .....                                             | 4  |
| X-ray Experimental for $\text{C}_{11}\text{H}_8\text{N}_6\text{O}_2$ (5) .....                                                                          | 5  |
| Table S2. Crystal data and structure refinement for 5 .....                                                                                             | 6  |
| Table S3. Atomic coordinates ( $\times 10^4$ ) and equivalent isotropic displacement parameters ( $\text{\AA}^2 \times 10^3$ ) for 5 .....              | 7  |
| Table S4. Bond lengths [ $\text{\AA}$ ] and angles [ $^\circ$ ] for 5 .....                                                                             | 8  |
| Table S5. Anisotropic displacement parameters ( $\text{\AA}^2 \times 10^3$ ) for 5 .....                                                                | 10 |
| Table S6. Hydrogen coordinates ( $\times 10^4$ ) and isotropic displacement parameters ( $\text{\AA}^2 \times 10^3$ ) for 5 .....                       | 11 |
| Table S7. Torsion angles [ $^\circ$ ] for 5 .....                                                                                                       | 12 |
| Figure S3: Experimental and simulated X-ray powder diffraction patterns of 5 .....                                                                      | 13 |
| X-ray Experimental for $\text{C}_{12}\text{H}_{11}\text{N}_5$ (6) .....                                                                                 | 14 |
| Table S8: Crystal data and structure refinement for 6 .....                                                                                             | 15 |
| Table S9. Atomic coordinates ( $\times 10^4$ ) and equivalent isotropic displacement parameters ( $\text{\AA}^2 \times 10^3$ ) for 6 .....              | 16 |
| Table S10. Bond lengths [ $\text{\AA}$ ] and angles [ $^\circ$ ] for 6 .....                                                                            | 17 |
| Table S11. Anisotropic displacement parameters ( $\text{\AA}^2 \times 10^3$ ) for 6 .....                                                               | 19 |
| Table S12. Hydrogen coordinates ( $\times 10^4$ ) and isotropic displacement parameters ( $\text{\AA}^2 \times 10^3$ ) for 6 .....                      | 20 |
| Table S13. Torsion angles [ $^\circ$ ] for 6 .....                                                                                                      | 21 |
| Table S14. Hydrogen bonds for 6 [ $\text{\AA}$ and $^\circ$ ] .....                                                                                     | 22 |
| Figure S4: Experimental and simulated X-ray powder diffraction patterns of 6 .....                                                                      | 23 |
| Figure S5: Solid-state structure of 6 showing H-bonding interactions .....                                                                              | 23 |
| X-ray Experimental for $\text{C}_8\text{H}_5\text{N}_4\text{O}_2\text{Br}$ (3) .....                                                                    | 24 |

|                                                                                                                                        |    |
|----------------------------------------------------------------------------------------------------------------------------------------|----|
| Table S15. Crystal data and structure refinement for 3 .....                                                                           | 25 |
| Table S16. Atomic coordinates ( $\times 10^4$ ) and equivalent isotropic displacement parameters ( $\text{\AA}^2 \times 10^3$ ) for 3. | 26 |
| Table S17. Bond lengths [ $\text{\AA}$ ] and angles [ $^\circ$ ] for 3 .....                                                           | 27 |
| Table S18. Anisotropic displacement parameters ( $\text{\AA}^2 \times 10^3$ ) for 3 .....                                              | 28 |
| Table S19. Hydrogen coordinates ( $\times 10^4$ ) and isotropic displacement parameters ( $\text{\AA}^2 \times 10^3$ ) for 3 .....     | 29 |
| Table S20. Torsion angles [ $^\circ$ ] for 3 .....                                                                                     | 30 |
| Figure S6: Single crystal structure of 3 .....                                                                                         | 31 |
| Figure S7: Experimental and simulated X-ray powder diffraction patterns of 3 .....                                                     | 31 |
| Notes and References .....                                                                                                             | 32 |

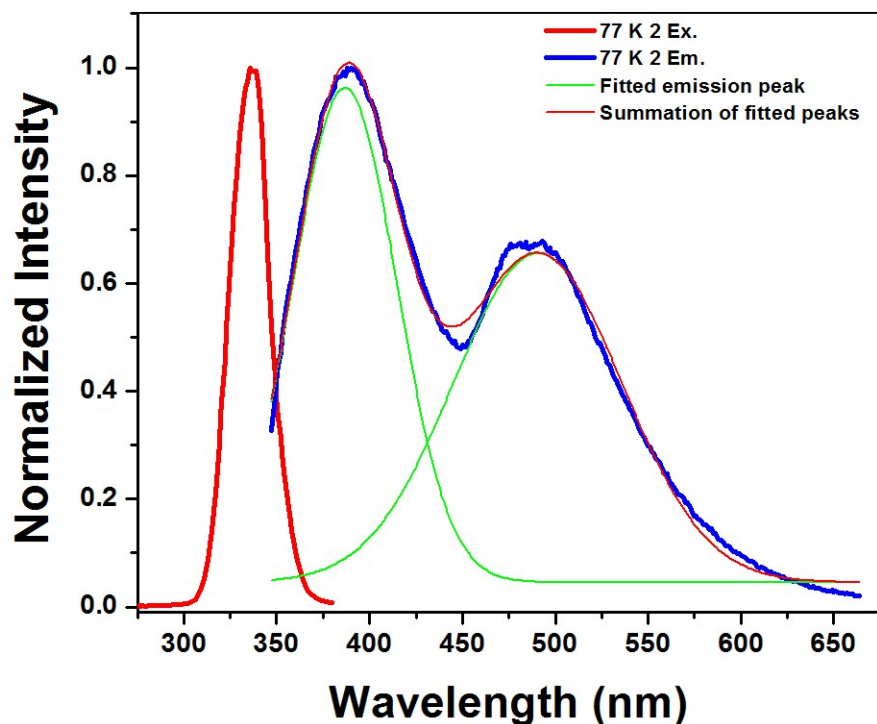

**Figure S1: 77 K excitation and emission spectra of 2 in EEET with fitting of emission spectrum peaks.**

77 K luminescence measurements were performed by dissolving **2** in 2:2:1:1 diethyl ether: ethyl iodide: ethanol: toluene solvent mixture, then cooling to a solid glass in a quartz liquid nitrogen bath. The spectrum was modeled using a two-peak polynomial fitting function in order to extrapolate the blue edge of phosphorescence for  $T_1$  determination ( $R^2 = 0.9963$ ).

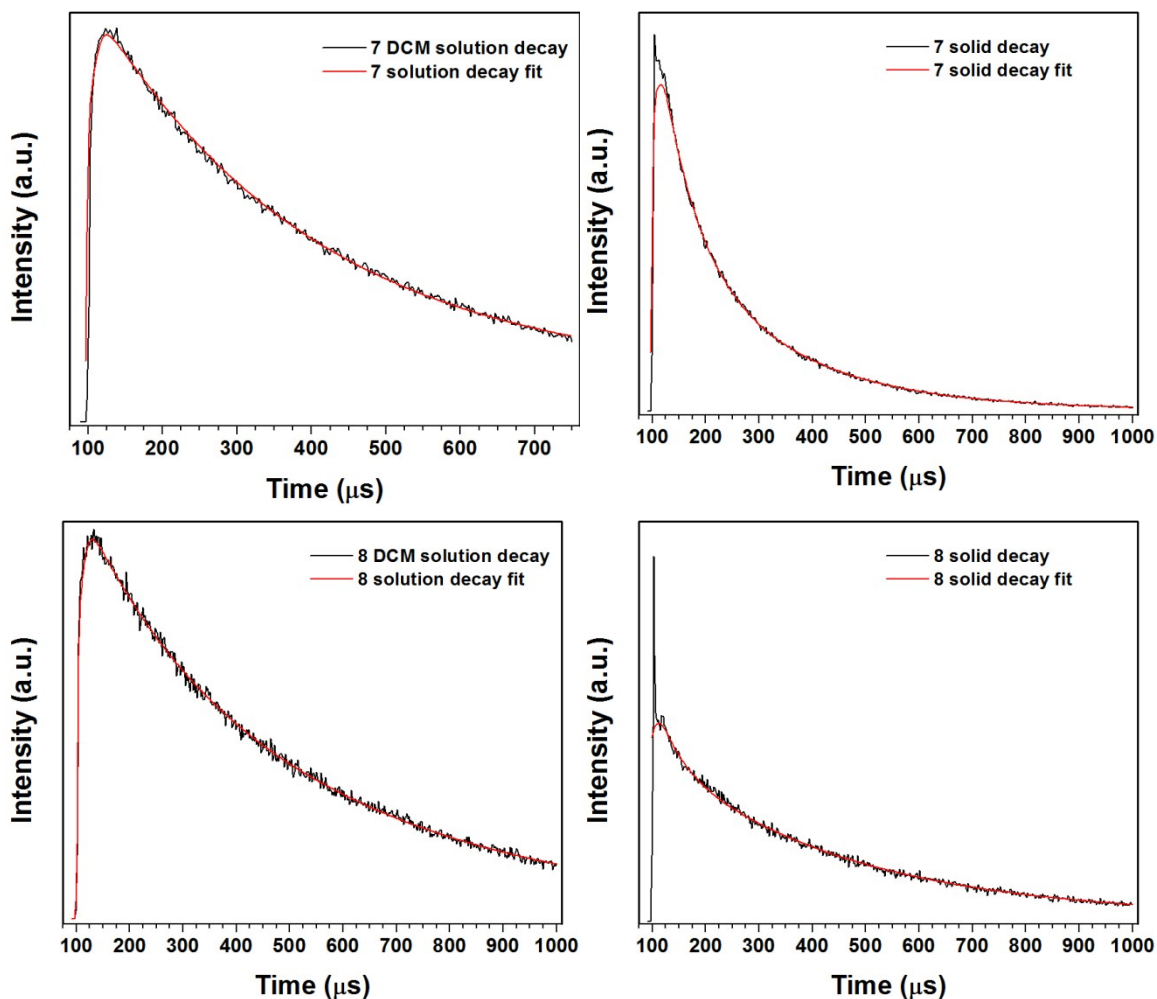

**Figure S2: Eu(III) luminescence decays and bi-exponential fits of compounds 7 (top) and 8 (bottom) in DCM solution (left) and solid state (right).**

Lifetime measurements were determined by monitoring the  $\lambda_{\max}$  of emission in all cases.

Specific excitation wavelengths and  $\tau_{\text{obs}}$  values are reported in Table 3 of the main text.

**Table S1. Emissive  $\tau_{\text{obs}}$  components of 7 and 8 and the respective contributions of each**

| Complex | Solvent | $\tau_1$ ( $\mu\text{s}$ ) | Contribution (%) | $\tau_2$ ( $\mu\text{s}$ ) | Contribution (%) | $\chi^2$ |
|---------|---------|----------------------------|------------------|----------------------------|------------------|----------|
| 7       | DCM     | $160 \pm 20$               | $20 \pm 3$       | $490 \pm 10$               | $80 \pm 3$       | 1.029    |
|         | Solid   | $41 \pm 3$                 | $34 \pm 2$       | $361 \pm 6$                | $66 \pm 2$       | 1.030    |
| 8       | DCM     | $66 \pm 9$                 | $13 \pm 1$       | $380 \pm 10$               | $87.4 \pm 0.5$   | 0.994    |
|         | Solid   | $60 \pm 2$                 | $52.7 \pm 0.9$   | $212 \pm 2$                | $47.3 \pm 0.9$   | 1.056    |

X- ray

**Experimental for C<sub>11</sub>H<sub>8</sub>N<sub>6</sub>O<sub>2</sub> (5):** Crystals grew as large, colorless prisms by slow evaporation from dichloromethane. The data crystal was cut from a larger crystal and had approximate dimensions; 0.62 x 0.42 x 0.30 mm. The data were collected on a Rigaku AFC12 diffractometer with a Saturn 724+ CCD using a graphite monochromator with MoK $\alpha$  radiation ( $\lambda = 0.71073\text{\AA}$ ). A total of 1138 frames of data were collected using  $\omega$ -scans with a scan range of  $0.5^\circ$  and a counting time of 15 seconds per frame. The data were collected at 100 K using a Rigaku XStream low temperature device. Details of crystal data, data collection and structure refinement are listed in Table S2. Data reduction were performed using the Rigaku Americas Corporation's Crystal Clear version 1.40.<sup>1</sup> The structure was solved by direct methods using SIR2004<sup>2</sup> and refined by full-matrix least-squares on  $F^2$  with anisotropic displacement parameters for the non-H atoms using SHELXL-2014/7.<sup>3</sup> Structure analysis was aided by use of the programs PLATON98<sup>4</sup> and WinGX.<sup>5</sup> The hydrogen atoms on carbon were calculated in ideal positions with isotropic displacement parameters set to 1.2xUeq of the attached atom (1.5xUeq for methyl hydrogen atoms).

The function,  $\Sigma w(|F_o|^2 - |F_c|^2)^2$ , was minimized, where  $w = 1/[(\sigma(F_o))^2 + (0.0457*P)^2 + (0.2349*P)]$  and  $P = (|F_o|^2 + 2|F_c|^2)/3$ .  $R_w(F^2)$  refined to 0.0919, with  $R(F)$  equal to 0.0332 and a goodness of fit,  $S$ , = 1.06. Definitions used for calculating  $R(F)$ ,  $R_w(F^2)$  and the goodness of fit,  $S$ , are given below.<sup>6</sup> The data were checked for secondary extinction effects but no correction was necessary. Neutral atom scattering factors and values used to calculate the linear absorption coefficient are from the International Tables for X-ray Crystallography (1992).<sup>7</sup> All figures were generated using SHELXTL/PC.<sup>8</sup> Tables of positional and thermal parameters, bond lengths and angles, torsion angles and figures are found below.

**Table S2. Crystal data and structure refinement for 5.**

|                                   |                                             |                              |
|-----------------------------------|---------------------------------------------|------------------------------|
| Empirical formula                 | C11 H8 N6 O2                                |                              |
| Formula weight                    | 256.23                                      |                              |
| Temperature                       | 100(2) K                                    |                              |
| Wavelength                        | 0.71073 Å                                   |                              |
| Crystal system                    | triclinic                                   |                              |
| Space group                       | P -1                                        |                              |
| Unit cell dimensions              | a = 6.0442(17) Å                            | $\alpha = 72.362(7)^\circ$ . |
|                                   | b = 8.393(2) Å                              | $\beta = 89.297(7)^\circ$ .  |
|                                   | c = 11.447(3) Å                             | $\gamma = 78.103(7)^\circ$ . |
| Volume                            | 540.7(3) Å <sup>3</sup>                     |                              |
| Z                                 | 2                                           |                              |
| Density (calculated)              | 1.574 Mg/m <sup>3</sup>                     |                              |
| Absorption coefficient            | 0.116 mm <sup>-1</sup>                      |                              |
| F(000)                            | 264                                         |                              |
| Crystal size                      | 0.620 x 0.420 x 0.300 mm <sup>3</sup>       |                              |
| Theta range for data collection   | 3.450 to 27.484°.                           |                              |
| Index ranges                      | -7<=h<=7, -10<=k<=10, -14<=l<=13            |                              |
| Reflections collected             | 7034                                        |                              |
| Independent reflections           | 2419 [R(int) = 0.0191]                      |                              |
| Completeness to theta = 25.242°   | 99.2 %                                      |                              |
| Absorption correction             | Semi-empirical from equivalents             |                              |
| Max. and min. transmission        | 1.00 and 0.901                              |                              |
| Refinement method                 | Full-matrix least-squares on F <sup>2</sup> |                              |
| Data / restraints / parameters    | 2419 / 0 / 172                              |                              |
| Goodness-of-fit on F <sup>2</sup> | 1.057                                       |                              |
| Final R indices [I>2sigma(I)]     | R1 = 0.0332, wR2 = 0.0904                   |                              |
| R indices (all data)              | R1 = 0.0357, wR2 = 0.0919                   |                              |
| Extinction coefficient            | n/a                                         |                              |
| Largest diff. peak and hole       | 0.295 and -0.273 e.Å <sup>-3</sup>          |                              |

**Table S3. Atomic coordinates ( $\times 10^4$ ) and equivalent isotropic displacement parameters ( $\text{\AA}^2 \times 10^3$ ) for 5.  $U(\text{eq})$  is defined as one third of the trace of the orthogonalized  $U^{ij}$  tensor.**

|     | x        | y        | z       | U(eq) |
|-----|----------|----------|---------|-------|
| C1  | 10732(2) | 9866(1)  | 1921(1) | 14(1) |
| C2  | 12688(2) | 10157(1) | 2389(1) | 16(1) |
| C3  | 14079(2) | 8766(2)  | 3223(1) | 18(1) |
| C4  | 13517(2) | 7163(2)  | 3566(1) | 17(1) |
| C5  | 11506(2) | 7064(1)  | 3047(1) | 13(1) |
| C6  | 7192(2)  | 11144(1) | 587(1)  | 17(1) |
| C7  | 6317(2)  | 12751(2) | -189(1) | 20(1) |
| C8  | 7963(2)  | 13714(2) | -153(1) | 19(1) |
| C9  | 8910(2)  | 5228(1)  | 2847(1) | 14(1) |
| C10 | 8849(2)  | 3548(1)  | 3435(1) | 15(1) |
| C11 | 10735(2) | 2870(1)  | 4279(1) | 16(1) |
| N1  | 9740(2)  | 12786(1) | 593(1)  | 18(1) |
| N2  | 9241(2)  | 11200(1) | 1046(1) | 14(1) |
| N3  | 10108(2) | 8363(1)  | 2250(1) | 13(1) |
| N4  | 10759(2) | 5489(1)  | 3349(1) | 14(1) |
| N5  | 11906(2) | 4059(1)  | 4235(1) | 16(1) |
| N6  | 7151(2)  | 2692(1)  | 3219(1) | 16(1) |
| O1  | 5585(1)  | 3512(1)  | 2456(1) | 20(1) |
| O2  | 7352(2)  | 1166(1)  | 3819(1) | 25(1) |

**Table S4. Bond lengths [Å] and angles [°] for 5.**

|          |            |             |            |
|----------|------------|-------------|------------|
| C1-N3    | 1.3338(14) | C7-H7       | 0.95       |
| C1-C2    | 1.3999(15) | C8-N1       | 1.3287(15) |
| C1-N2    | 1.4123(14) | C8-H8       | 0.95       |
| C2-C3    | 1.3861(16) | C9-N4       | 1.3490(14) |
| C2-H2    | 0.95       | C9-C10      | 1.3743(15) |
| C3-C4    | 1.3944(16) | C9-H9       | 0.95       |
| C3-H3    | 0.95       | C10-C11     | 1.4080(15) |
| C4-C5    | 1.3882(15) | C10-N6      | 1.4314(14) |
| C4-H4    | 0.95       | C11-N5      | 1.3268(15) |
| C5-N3    | 1.3304(14) | C11-H11     | 0.95       |
| C5-N4    | 1.4271(14) | N1-N2       | 1.3694(13) |
| C6-N2    | 1.3662(15) | N4-N5       | 1.3735(13) |
| C6-C7    | 1.3710(16) | N6-O1       | 1.2330(13) |
| C6-H6    | 0.95       | N6-O2       | 1.2374(13) |
| C7-C8    | 1.4130(17) |             |            |
| N3-C1-C2 | 124.32(10) | C6-C7-C8    | 105.08(10) |
| N3-C1-N2 | 114.86(10) | C6-C7-H7    | 127.5      |
| C2-C1-N2 | 120.82(10) | C8-C7-H7    | 127.5      |
| C3-C2-C1 | 116.91(10) | N1-C8-C7    | 112.02(10) |
| C3-C2-H2 | 121.5      | N1-C8-H8    | 124.0      |
| C1-C2-H2 | 121.5      | C7-C8-H8    | 124.0      |
| C2-C3-C4 | 120.49(10) | N4-C9-C10   | 105.06(9)  |
| C2-C3-H3 | 119.8      | N4-C9-H9    | 127.5      |
| C4-C3-H3 | 119.8      | C10-C9-H9   | 127.5      |
| C5-C4-C3 | 116.49(10) | C9-C10-C11  | 106.93(10) |
| C5-C4-H4 | 121.8      | C9-C10-N6   | 125.39(10) |
| C3-C4-H4 | 121.8      | C11-C10-N6  | 127.68(10) |
| N3-C5-C4 | 125.26(10) | N5-C11-C10  | 110.39(10) |
| N3-C5-N4 | 113.77(9)  | N5-C11-H11  | 124.8      |
| C4-C5-N4 | 120.97(10) | C10-C11-H11 | 124.8      |
| N2-C6-C7 | 106.59(10) | C8-N1-N2    | 104.20(9)  |
| N2-C6-H6 | 126.7      | C6-N2-N1    | 112.12(9)  |
| C7-C6-H6 | 126.7      | C6-N2-C1    | 127.30(10) |



|          |            |           |            |
|----------|------------|-----------|------------|
| N1-N2-C1 | 120.54(9)  | C11-N5-N4 | 104.51(9)  |
| C5-N3-C1 | 116.49(10) | O1-N6-O2  | 124.16(10) |
| C9-N4-N5 | 113.10(9)  | O1-N6-C10 | 118.42(10) |
| C9-N4-C5 | 125.79(9)  | O2-N6-C10 | 117.42(10) |
| N5-N4-C5 | 121.11(9)  |           |            |

---

**Table S5. Anisotropic displacement parameters ( $\text{\AA}^2 \times 10^3$ ) for 5. The anisotropic displacement factor exponent takes the form:  $-2\pi^2 [ h^2 a^{*2} U^{11} + \dots + 2 h k a^* b^* U^{12} ]$**

|     | U <sup>11</sup> | U <sup>22</sup> | U <sup>33</sup> | U <sup>23</sup> | U <sup>13</sup> | U <sup>12</sup> |
|-----|-----------------|-----------------|-----------------|-----------------|-----------------|-----------------|
| C1  | 14(1)           | 13(1)           | 15(1)           | -5(1)           | 2(1)            | -3(1)           |
| C2  | 17(1)           | 14(1)           | 21(1)           | -6(1)           | 3(1)            | -7(1)           |
| C3  | 15(1)           | 21(1)           | 22(1)           | -7(1)           | -1(1)           | -7(1)           |
| C4  | 15(1)           | 17(1)           | 17(1)           | -3(1)           | -1(1)           | -4(1)           |
| C5  | 15(1)           | 12(1)           | 14(1)           | -5(1)           | 3(1)            | -5(1)           |
| C6  | 17(1)           | 17(1)           | 17(1)           | -6(1)           | 1(1)            | -4(1)           |
| C7  | 21(1)           | 19(1)           | 18(1)           | -5(1)           | -1(1)           | -1(1)           |
| C8  | 26(1)           | 13(1)           | 18(1)           | -3(1)           | 3(1)            | -2(1)           |
| C9  | 15(1)           | 14(1)           | 14(1)           | -4(1)           | 0(1)            | -4(1)           |
| C10 | 18(1)           | 13(1)           | 15(1)           | -5(1)           | 2(1)            | -5(1)           |
| C11 | 20(1)           | 12(1)           | 16(1)           | -2(1)           | 0(1)            | -4(1)           |
| N1  | 22(1)           | 11(1)           | 21(1)           | -3(1)           | 4(1)            | -6(1)           |
| N2  | 16(1)           | 11(1)           | 16(1)           | -3(1)           | 1(1)            | -4(1)           |
| N3  | 14(1)           | 13(1)           | 15(1)           | -5(1)           | 1(1)            | -4(1)           |
| N4  | 14(1)           | 12(1)           | 14(1)           | -3(1)           | -1(1)           | -4(1)           |
| N5  | 18(1)           | 12(1)           | 16(1)           | -1(1)           | -2(1)           | -2(1)           |
| N6  | 20(1)           | 14(1)           | 16(1)           | -6(1)           | 2(1)            | -7(1)           |
| O1  | 20(1)           | 21(1)           | 21(1)           | -6(1)           | -2(1)           | -7(1)           |
| O2  | 34(1)           | 14(1)           | 28(1)           | -3(1)           | -1(1)           | -12(1)          |

**Table S6. Hydrogen coordinates ( $\times 10^4$ ) and isotropic displacement parameters ( $\text{\AA}^2 \times 10^{-3}$ ) for 5.**

|     | x     | y     | z    | U(eq) |
|-----|-------|-------|------|-------|
| H2  | 13046 | 11258 | 2146 | 20    |
| H3  | 15425 | 8905  | 3564 | 22    |
| H4  | 14461 | 6190  | 4125 | 20    |
| H6  | 6508  | 10180 | 770  | 20    |
| H7  | 4909  | 13134 | -651 | 24    |
| H8  | 7815  | 14887 | -609 | 23    |
| H9  | 7875  | 6031  | 2222 | 17    |
| H11 | 11116 | 1723  | 4804 | 20    |

**Table S7. Torsion angles [°] for 5.**

---

|               |             |               |             |
|---------------|-------------|---------------|-------------|
| N3-C1-C2-C3   | 1.87(17)    | N3-C1-N2-N1   | -177.15(9)  |
| N2-C1-C2-C3   | -178.62(10) | C2-C1-N2-N1   | 3.29(15)    |
| C1-C2-C3-C4   | -0.04(17)   | C4-C5-N3-C1   | 1.02(16)    |
| C2-C3-C4-C5   | -1.10(17)   | N4-C5-N3-C1   | -179.22(9)  |
| C3-C4-C5-N3   | 0.64(17)    | C2-C1-N3-C5   | -2.32(16)   |
| C3-C4-C5-N4   | -179.11(10) | N2-C1-N3-C5   | 178.14(9)   |
| N2-C6-C7-C8   | 0.26(12)    | C10-C9-N4-N5  | 0.07(12)    |
| C6-C7-C8-N1   | -0.19(13)   | C10-C9-N4-C5  | -178.82(10) |
| N4-C9-C10-C11 | -0.42(12)   | N3-C5-N4-C9   | 4.37(15)    |
| N4-C9-C10-N6  | 178.96(10)  | C4-C5-N4-C9   | -175.86(10) |
| C9-C10-C11-N5 | 0.65(13)    | N3-C5-N4-N5   | -174.44(9)  |
| N6-C10-C11-N5 | -178.71(10) | C4-C5-N4-N5   | 5.34(15)    |
| C7-C8-N1-N2   | 0.03(12)    | C10-C11-N5-N4 | -0.58(12)   |
| C7-C6-N2-N1   | -0.26(13)   | C9-N4-N5-C11  | 0.32(12)    |
| C7-C6-N2-C1   | 177.36(10)  | C5-N4-N5-C11  | 179.27(9)   |
| C8-N1-N2-C6   | 0.14(12)    | C9-C10-N6-O1  | -0.88(16)   |
| C8-N1-N2-C1   | -177.66(9)  | C11-C10-N6-O1 | 178.37(10)  |
| N3-C1-N2-C6   | 5.42(16)    | C9-C10-N6-O2  | 179.38(11)  |
| C2-C1-N2-C6   | -174.14(10) | C11-C10-N6-O2 | -1.38(17)   |

---

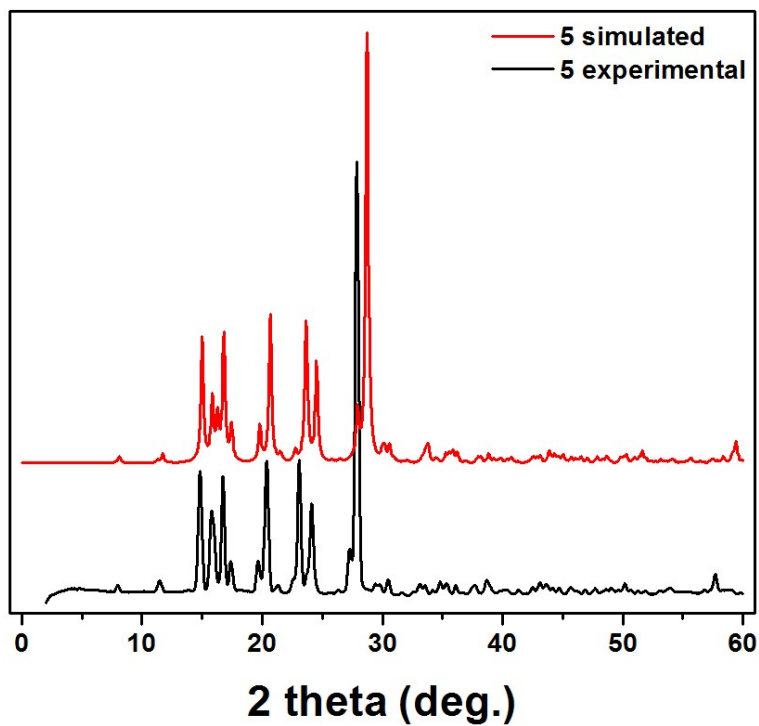

**Figure S3: Experimental and simulated X-ray powder diffraction patterns of 5.**

**X-ray Experimental for C<sub>12</sub>H<sub>11</sub>N<sub>5</sub> (6):** Crystals grew as pale yellow plates by slow evaporation from dichloromethane. The data crystal had approximate dimensions; 0.18 x 0.06 x 0.06 mm. The data were collected on an Agilent Technologies SuperNova Dual Source diffractometer using a  $\mu$ -focus Cu K $\alpha$  radiation source ( $\lambda = 1.5418\text{\AA}$ ) with collimating mirror monochromators. A total of 965 frames of data were collected using  $\omega$ -scans with a scan range of 1° and a counting time of 15 seconds per frame with a detector offset of +/- 41.9° and 48 seconds per frame with a detector offset of +/- 111.0°. The data were collected at 173 K using an Oxford Cryostream low temperature device. Details of crystal data, data collection and structure refinement are listed in Table S8. Data collection, unit cell refinement and data reduction were performed using Agilent Technologies CrysAlisPro V 1.171.37.31.<sup>1</sup> The structure was solved by direct methods using SHELXT<sup>2</sup> and refined by full-matrix least-squares on F<sup>2</sup> with anisotropic displacement parameters for the non-H atoms using SHELXL-2016/6.<sup>3</sup> Structure analysis was aided by use of the programs PLATON98<sup>4</sup> and WinGX.<sup>5</sup> The hydrogen atoms were calculated in ideal positions with isotropic displacement parameters set to 1.2xU<sub>eq</sub> of the attached atom. The hydrogen atoms on the amine nitrogen, N6, were observed in a  $\Delta F$  map and refined with isotropic displacement parameters.

The function,  $\Sigma w(|F_o|^2 - |F_c|^2)^2$ , was minimized, where  $w = 1/[(\sigma(F_o))^2 + (0.1058*P)^2 + (0.3513*P)]$  and  $P = (|F_o|^2 + 2|F_c|^2)/3$ .  $R_w(F^2)$  refined to 0.214, with R(F) equal to 0.0670 and a goodness of fit, S, = 1.05. Definitions used for calculating R(F),  $R_w(F^2)$  and the goodness of fit, S, are given below.<sup>6</sup> The data were checked for secondary extinction effects but no correction was necessary. Neutral atom scattering factors and values used to calculate the linear absorption coefficient are from the International Tables for X-ray Crystallography (1992).<sup>7</sup> All figures were generated using SHELXTL/PC.<sup>8</sup> Tables of positional and thermal parameters, bond lengths and angles, torsion angles and figures are found below.

**Table S8: Crystal data and structure refinement for 6.**

|                                   |                                             |                              |
|-----------------------------------|---------------------------------------------|------------------------------|
| Empirical formula                 | C12 H11 N5                                  |                              |
| Formula weight                    | 225.26                                      |                              |
| Temperature                       | 173(2) K                                    |                              |
| Wavelength                        | 1.54184 Å                                   |                              |
| Crystal system                    | monoclinic                                  |                              |
| Space group                       | P 21/c                                      |                              |
| Unit cell dimensions              | a = 22.9809(16) Å                           | $\alpha = 90^\circ$ .        |
|                                   | b = 3.7881(3) Å                             | $\beta = 104.812(7)^\circ$ . |
|                                   | c = 12.2183(9) Å                            | $\gamma = 90^\circ$ .        |
| Volume                            | 1028.31(14) Å <sup>3</sup>                  |                              |
| Z                                 | 4                                           |                              |
| Density (calculated)              | 1.455 Mg/m <sup>3</sup>                     |                              |
| Absorption coefficient            | 0.759 mm <sup>-1</sup>                      |                              |
| F(000)                            | 472                                         |                              |
| Crystal size                      | 0.180 x 0.060 x 0.060 mm <sup>3</sup>       |                              |
| Theta range for data collection   | 3.979 to 75.692°.                           |                              |
| Index ranges                      | -19 ≤ h ≤ 28, -4 ≤ k ≤ 3, -15 ≤ l ≤ 15      |                              |
| Reflections collected             | 5061                                        |                              |
| Independent reflections           | 2060 [R(int) = 0.0500]                      |                              |
| Completeness to theta = 67.684°   | 99.3 %                                      |                              |
| Absorption correction             | Semi-empirical from equivalents             |                              |
| Max. and min. transmission        | 1.00 and 0.485                              |                              |
| Refinement method                 | Full-matrix least-squares on F <sup>2</sup> |                              |
| Data / restraints / parameters    | 2060 / 0 / 162                              |                              |
| Goodness-of-fit on F <sup>2</sup> | 1.050                                       |                              |
| Final R indices [I > 2σ(I)]       | R1 = 0.0670, wR2 = 0.1865                   |                              |
| R indices (all data)              | R1 = 0.0803, wR2 = 0.2137                   |                              |
| Extinction coefficient            | n/a                                         |                              |
| Largest diff. peak and hole       | 0.340 and -0.358 e.Å <sup>-3</sup>          |                              |

**Table S9. Atomic coordinates ( $\times 10^4$ ) and equivalent isotropic displacement parameters ( $\text{\AA}^2 \times 10^3$ ) for 6.  $U(\text{eq})$  is defined as one third of the trace of the orthogonalized  $U_{ij}$  tensor.**

|     | x       | y       | z       | $U(\text{eq})$ |
|-----|---------|---------|---------|----------------|
| C1  | 6872(1) | 5198(6) | 3314(2) | 25(1)          |
| C2  | 6825(1) | 6797(6) | 4314(2) | 29(1)          |
| C3  | 7360(1) | 7520(6) | 5113(2) | 30(1)          |
| C4  | 7904(1) | 6685(6) | 4906(2) | 29(1)          |
| C5  | 7895(1) | 5066(6) | 3874(2) | 24(1)          |
| C6  | 6319(1) | 2818(6) | 1442(2) | 30(1)          |
| C7  | 5726(1) | 2497(7) | 897(2)  | 35(1)          |
| C8  | 5421(1) | 3842(7) | 1681(2) | 38(1)          |
| C9  | 8515(1) | 2872(6) | 2611(2) | 26(1)          |
| C10 | 9113(1) | 2104(6) | 2793(2) | 28(1)          |
| C11 | 9360(1) | 2816(7) | 3952(2) | 32(1)          |
| N1  | 5796(1) | 4941(6) | 2632(2) | 34(1)          |
| N2  | 6351(1) | 4305(5) | 2470(2) | 28(1)          |
| N3  | 7391(1) | 4342(5) | 3081(2) | 25(1)          |
| N4  | 8432(1) | 4027(5) | 3627(2) | 25(1)          |
| N5  | 8951(1) | 3970(6) | 4457(2) | 34(1)          |
| N6  | 9446(1) | 1071(7) | 2035(2) | 36(1)          |



**Table S10. Bond lengths [Å] and angles [°] for 6.**

|          |            |             |            |
|----------|------------|-------------|------------|
| C1-N3    | 1.334(3)   | C7-H7       | 0.95       |
| C1-C2    | 1.393(3)   | C8-N1       | 1.324(3)   |
| C1-N2    | 1.408(3)   | C8-H8       | 0.95       |
| C2-C3    | 1.386(3)   | C9-C10      | 1.368(3)   |
| C2-H2    | 0.95       | C9-N4       | 1.373(3)   |
| C3-C4    | 1.376(3)   | C9-H9       | 0.95       |
| C3-H3    | 0.95       | C10-N6      | 1.399(3)   |
| C4-C5    | 1.397(3)   | C10-C11     | 1.411(3)   |
| C4-H4    | 0.95       | C11-N5      | 1.323(3)   |
| C5-N3    | 1.335(3)   | C11-H11     | 0.95       |
| C5-N4    | 1.401(3)   | N1-N2       | 1.361(3)   |
| C6-C7    | 1.360(3)   | N4-N5       | 1.354(2)   |
| C6-N2    | 1.361(3)   | N6-H6A      | 0.90(4)    |
| C6-H6    | 0.95       | N6-H6B      | 1.04(4)    |
| C7-C8    | 1.418(4)   |             |            |
|          |            |             |            |
| N3-C1-C2 | 124.5(2)   | C6-C7-C8    | 104.0(2)   |
| N3-C1-N2 | 115.1(2)   | C6-C7-H7    | 128.0      |
| C2-C1-N2 | 120.4(2)   | C8-C7-H7    | 128.0      |
| C3-C2-C1 | 116.8(2)   | N1-C8-C7    | 112.5(2)   |
| C3-C2-H2 | 121.6      | N1-C8-H8    | 123.7      |
| C1-C2-H2 | 121.6      | C7-C8-H8    | 123.7      |
| C4-C3-C2 | 120.6(2)   | C10-C9-N4   | 106.60(19) |
| C4-C3-H3 | 119.7      | C10-C9-H9   | 126.7      |
| C2-C3-H3 | 119.7      | N4-C9-H9    | 126.7      |
| C3-C4-C5 | 117.5(2)   | C9-C10-N6   | 130.5(2)   |
| C3-C4-H4 | 121.2      | C9-C10-C11  | 104.6(2)   |
| C5-C4-H4 | 121.2      | N6-C10-C11  | 124.7(2)   |
| N3-C5-C4 | 123.7(2)   | N5-C11-C10  | 112.3(2)   |
| N3-C5-N4 | 115.81(19) | N5-C11-H11  | 123.9      |
| C4-C5-N4 | 120.44(19) | C10-C11-H11 | 123.9      |
| C7-C6-N2 | 107.5(2)   | C8-N1-N2    | 103.9(2)   |
| C7-C6-H6 | 126.3      | C6-N2-N1    | 112.07(19) |
| N2-C6-H6 | 126.3      | C6-N2-C1    | 127.6(2)   |

|          |            |            |            |
|----------|------------|------------|------------|
| N1-N2-C1 | 120.3(2)   | C11-N5-N4  | 104.53(18) |
| C1-N3-C5 | 116.9(2)   | C10-N6-H6A | 119(3)     |
| N5-N4-C9 | 111.94(18) | C10-N6-H6B | 114(2)     |
| N5-N4-C5 | 119.97(18) | H6A-N6-H6B | 113(3)     |
| C9-N4-C5 | 128.06(18) |            |            |

---

**Table S11. Anisotropic displacement parameters ( $\text{\AA}^2 \times 10^3$ ) for 6. The anisotropic displacement factor exponent takes the form:  $-2\pi^2 [ h^2 a^{*2} U^{11} + \dots + 2 h k a^* b^* U^{12} ]$**

|     | U <sup>11</sup> | U <sup>22</sup> | U <sup>33</sup> | U <sup>23</sup> | U <sup>13</sup> | U <sup>12</sup> |
|-----|-----------------|-----------------|-----------------|-----------------|-----------------|-----------------|
| C1  | 20(1)           | 26(1)           | 30(1)           | 4(1)            | 9(1)            | 0(1)            |
| C2  | 24(1)           | 32(1)           | 34(1)           | 1(1)            | 14(1)           | 5(1)            |
| C3  | 31(1)           | 32(1)           | 30(1)           | -3(1)           | 13(1)           | 2(1)            |
| C4  | 25(1)           | 31(1)           | 30(1)           | -2(1)           | 6(1)            | -1(1)           |
| C5  | 18(1)           | 28(1)           | 29(1)           | 5(1)            | 9(1)            | -1(1)           |
| C6  | 22(1)           | 33(1)           | 35(1)           | -2(1)           | 9(1)            | -2(1)           |
| C7  | 23(1)           | 37(1)           | 43(1)           | -1(1)           | 6(1)            | -6(1)           |
| C8  | 16(1)           | 47(2)           | 50(1)           | 4(1)            | 7(1)            | -2(1)           |
| C9  | 19(1)           | 34(1)           | 26(1)           | 0(1)            | 7(1)            | 0(1)            |
| C10 | 19(1)           | 34(1)           | 31(1)           | 2(1)            | 6(1)            | -1(1)           |
| C11 | 15(1)           | 50(1)           | 32(1)           | 1(1)            | 4(1)            | -2(1)           |
| N1  | 18(1)           | 44(1)           | 44(1)           | 2(1)            | 12(1)           | 2(1)            |
| N2  | 16(1)           | 34(1)           | 35(1)           | 3(1)            | 9(1)            | 1(1)            |
| N3  | 19(1)           | 30(1)           | 28(1)           | 2(1)            | 8(1)            | 1(1)            |
| N4  | 16(1)           | 34(1)           | 26(1)           | -1(1)           | 5(1)            | 1(1)            |
| N5  | 20(1)           | 50(1)           | 28(1)           | -1(1)           | 1(1)            | 2(1)            |
| N6  | 22(1)           | 54(1)           | 34(1)           | -2(1)           | 10(1)           | 5(1)            |

**Table S12. Hydrogen coordinates ( $\times 10^4$ ) and isotropic displacement parameters ( $\text{\AA}^2 \times 10^{-3}$ ) for 6.**

|     | x        | y         | z        | U(eq)  |
|-----|----------|-----------|----------|--------|
| H2  | 6446     | 7365      | 4443     | 35     |
| H3  | 7350     | 8603      | 5809     | 36     |
| H4  | 8273     | 7190      | 5444     | 35     |
| H6  | 6649     | 2130      | 1158     | 36     |
| H7  | 5555     | 1583      | 160      | 42     |
| H8  | 4995     | 3943      | 1539     | 45     |
| H9  | 8214     | 2649      | 1918     | 32     |
| H11 | 9773     | 2501      | 4328     | 39     |
| H6A | 9716(18) | -690(120) | 2240(40) | 84(14) |
| H6B | 9189(15) | 830(100)  | 1210(30) | 67(11) |

**Table S13. Torsion angles [°] for 6.**

---

|               |           |               |             |
|---------------|-----------|---------------|-------------|
| N3-C1-C2-C3   | -0.1(4)   | N3-C1-N2-C6   | -2.8(3)     |
| N2-C1-C2-C3   | 178.6(2)  | C2-C1-N2-C6   | 178.4(2)    |
| C1-C2-C3-C4   | 0.2(4)    | N3-C1-N2-N1   | 177.72(18)  |
| C2-C3-C4-C5   | -0.6(4)   | C2-C1-N2-N1   | -1.2(3)     |
| C3-C4-C5-N3   | 1.0(3)    | C2-C1-N3-C5   | 0.5(3)      |
| C3-C4-C5-N4   | -177.6(2) | N2-C1-N3-C5   | -178.34(17) |
| N2-C6-C7-C8   | -0.8(3)   | C4-C5-N3-C1   | -0.9(3)     |
| C6-C7-C8-N1   | 0.6(3)    | N4-C5-N3-C1   | 177.76(18)  |
| N4-C9-C10-N6  | -175.0(2) | C10-C9-N4-N5  | -1.1(3)     |
| N4-C9-C10-C11 | 1.0(3)    | C10-C9-N4-C5  | -178.8(2)   |
| C9-C10-C11-N5 | -0.6(3)   | N3-C5-N4-N5   | -166.33(19) |
| N6-C10-C11-N5 | 175.7(2)  | C4-C5-N4-N5   | 12.4(3)     |
| C7-C8-N1-N2   | -0.1(3)   | N3-C5-N4-C9   | 11.2(3)     |
| C7-C6-N2-N1   | 0.9(3)    | C4-C5-N4-C9   | -170.1(2)   |
| C7-C6-N2-C1   | -178.7(2) | C10-C11-N5-N4 | -0.1(3)     |
| C8-N1-N2-C6   | -0.5(3)   | C9-N4-N5-C11  | 0.8(3)      |
| C8-N1-N2-C1   | 179.1(2)  | C5-N4-N5-C11  | 178.7(2)    |

---

**Table S14. Hydrogen bonds for 6 [ $\text{\AA}$  and  $^\circ$ ].**

| D-H...A       | d(D-H)  | d(H...A) | d(D...A) | $\angle(\text{DHA})$ |
|---------------|---------|----------|----------|----------------------|
| N6-H6A...N6#1 | 0.90(4) | 2.27(4)  | 3.144(3) | 165(4)               |
| N6-H6B...N5#2 | 1.04(4) | 2.07(4)  | 3.064(3) | 160(3)               |

Symmetry transformations used to generate equivalent atoms:

#1  $-x+2, y-1/2, -z+1/2$  #2  $x, -y+1/2, z-1/2$

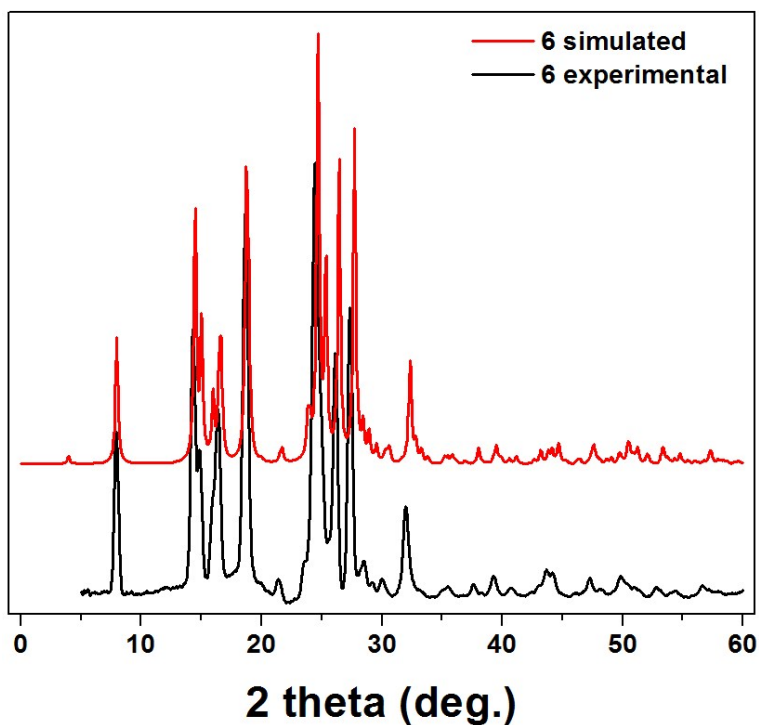

Figure S4: Experimental and simulated X-ray powder diffraction patterns of 6.

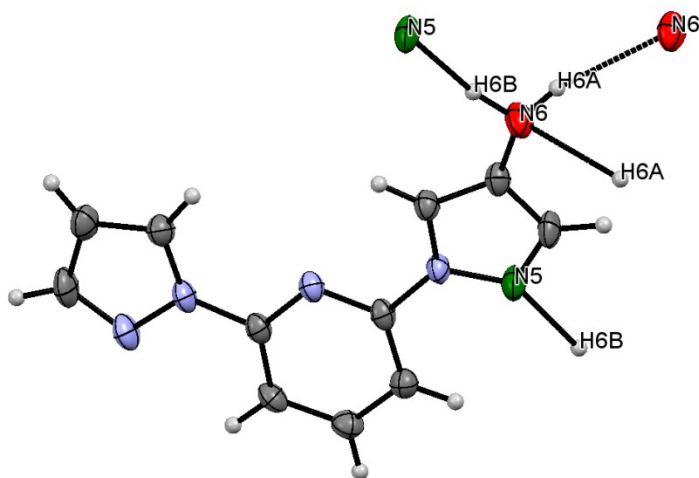

Figure S5: Solid-state structure of 6 showing H-bonding interactions. All atoms participating in H-bonding are labeled; atoms N5 and N6 are colored green and red, respectively, for clarity.

**X-ray Experimental for C<sub>8</sub>H<sub>5</sub>N<sub>4</sub>O<sub>2</sub>Br (3):** Crystals grew as colorless prisms by slow evaporation from dichloromethane. The data crystal had approximate dimensions; 0.39 x 0.18 x 0.046 mm. The data were collected on a Rigaku AFC12 diffractometer with a Saturn 724+ CCD using a graphite monochromator with MoK $\alpha$  radiation ( $\lambda = 0.71073\text{\AA}$ ). A total of 1299 frames of data were collected using  $\omega$ -scans with a scan range of  $0.5^\circ$  and a counting time of 20 seconds per frame. The data were collected at 100 K using an Rigaku XStream low temperature device. Details of crystal data, data collection and structure refinement are listed in Table S15. Data reduction were performed using the Rigaku Americas Corporation's Crystal Clear version 1.40.<sup>1</sup> The structure was solved by direct methods using SIR2004<sup>2</sup> and refined by full-matrix least-squares on  $F^2$  with anisotropic displacement parameters for the non-H atoms using SHELXL-2016/6.<sup>3</sup> Structure analysis was aided by use of the programs PLATON98<sup>4</sup> and WinGX.<sup>5</sup> The hydrogen atoms on carbon were located in a  $\Delta F$  map and refined with isotropic displacement parameters.

The function,  $\sum w(|F_o|^2 - |F_c|^2)^2$ , was minimized, where  $w = 1/[(\sigma(F_o))^2 + (0.0328*P)^2 + (0.275*P)]$  and  $P = (|F_o|^2 + 2|F_c|^2)/3$ .  $R_w(F^2)$  refined to 0.0680, with  $R(F)$  equal to 0.0269 and a goodness of fit,  $S$ , = 1.10. Definitions used for calculating  $R(F)$ ,  $R_w(F^2)$  and the goodness of fit,  $S$ , are given below.<sup>6</sup> The data were checked for secondary extinction effects but no correction was necessary. Neutral atom scattering factors and values used to calculate the linear absorption coefficient are from the International Tables for X-ray Crystallography (1992).<sup>7</sup> All figures were generated using SHELXTL/PC.<sup>8</sup> Tables of positional and thermal parameters, bond lengths and angles, torsion angles and figures are found below.



**Table S15. Crystal data and structure refinement for 3.**

|                                   |                                             |                              |
|-----------------------------------|---------------------------------------------|------------------------------|
| Empirical formula                 | C8 H5 Br N4 O2                              |                              |
| Formula weight                    | 269.07                                      |                              |
| Temperature                       | 100(2) K                                    |                              |
| Wavelength                        | 0.71073 Å                                   |                              |
| Crystal system                    | triclinic                                   |                              |
| Space group                       | P -1                                        |                              |
| Unit cell dimensions              | a = 5.1820(14) Å                            | $\alpha = 77.698(7)^\circ$ . |
|                                   | b = 8.556(3) Å                              | $\beta = 81.398(7)^\circ$ .  |
|                                   | c = 11.285(3) Å                             | $\gamma = 75.758(7)^\circ$ . |
| Volume                            | 471.3(2) Å <sup>3</sup>                     |                              |
| Z                                 | 2                                           |                              |
| Density (calculated)              | 1.896 Mg/m <sup>3</sup>                     |                              |
| Absorption coefficient            | 4.344 mm <sup>-1</sup>                      |                              |
| F(000)                            | 264                                         |                              |
| Crystal size                      | 0.390 x 0.180 x 0.046 mm <sup>3</sup>       |                              |
| Theta range for data collection   | 3.377 to 27.367°.                           |                              |
| Index ranges                      | -6<=h<=6, -11<=k<=10, -14<=l<=14            |                              |
| Reflections collected             | 6902                                        |                              |
| Independent reflections           | 2125 [R(int) = 0.0408]                      |                              |
| Completeness to theta = 25.242°   | 99.6 %                                      |                              |
| Absorption correction             | Semi-empirical from equivalents             |                              |
| Max. and min. transmission        | 1.00 and 0.576                              |                              |
| Refinement method                 | Full-matrix least-squares on F <sup>2</sup> |                              |
| Data / restraints / parameters    | 2125 / 0 / 156                              |                              |
| Goodness-of-fit on F <sup>2</sup> | 1.096                                       |                              |
| Final R indices [I>2sigma(I)]     | R1 = 0.0269, wR2 = 0.0666                   |                              |
| R indices (all data)              | R1 = 0.0288, wR2 = 0.0680                   |                              |
| Extinction coefficient            | n/a                                         |                              |
| Largest diff. peak and hole       | 0.662 and -0.446 e.Å <sup>-3</sup>          |                              |

**Table S16. Atomic coordinates ( $\times 10^4$ ) and equivalent isotropic displacement parameters ( $\text{\AA}^2 \times 10^3$ ) for 3.  $U(\text{eq})$  is defined as one third of the trace of the orthogonalized  $U^{ij}$  tensor.**

|     | x       | y       | z       | $U(\text{eq})$ |
|-----|---------|---------|---------|----------------|
| C1  | 4769(4) | 7291(3) | 3689(2) | 16(1)          |
| C2  | 6689(4) | 8200(3) | 3185(2) | 18(1)          |
| C3  | 8305(4) | 7763(3) | 2159(2) | 19(1)          |
| C4  | 7966(4) | 6464(3) | 1674(2) | 16(1)          |
| C5  | 5981(4) | 5664(2) | 2279(2) | 14(1)          |
| C6  | 3538(4) | 3485(3) | 2338(2) | 14(1)          |
| C7  | 3819(4) | 2339(2) | 1611(2) | 14(1)          |
| C8  | 5993(4) | 2543(3) | 720(2)  | 17(1)          |
| Br1 | 2457(1) | 7866(1) | 5082(1) | 20(1)          |
| N1  | 4360(3) | 6056(2) | 3261(2) | 16(1)          |
| N2  | 5472(3) | 4314(2) | 1861(2) | 14(1)          |
| N3  | 7025(4) | 3744(2) | 874(2)  | 17(1)          |
| N4  | 2168(3) | 1181(2) | 1736(2) | 15(1)          |
| O1  | 2461(3) | 395(2)  | 910(2)  | 22(1)          |
| O2  | 544(3)  | 1039(2) | 2646(1) | 21(1)          |

**Table S17. Bond lengths [Å] and angles [°] for 3.**

---

|           |            |          |            |
|-----------|------------|----------|------------|
| C1-N1     | 1.324(3)   | C6-N2    | 1.350(3)   |
| C1-C2     | 1.393(3)   | C6-C7    | 1.376(3)   |
| C1-Br1    | 1.904(2)   | C6-H6    | 0.91(3)    |
| C2-C3     | 1.386(3)   | C7-C8    | 1.412(3)   |
| C2-H2     | 0.93(3)    | C7-N4    | 1.434(3)   |
| C3-C4     | 1.397(3)   | C8-N3    | 1.321(3)   |
| C3-H3     | 0.93(3)    | C8-H8    | 0.97(3)    |
| C4-C5     | 1.389(3)   | N2-N3    | 1.377(2)   |
| C4-H4     | 0.93(3)    | N4-O2    | 1.232(2)   |
| C5-N1     | 1.337(3)   | N4-O1    | 1.232(2)   |
| C5-N2     | 1.430(3)   |          |            |
|           |            |          |            |
| N1-C1-C2  | 125.2(2)   | N2-C6-H6 | 121.1(18)  |
| N1-C1-Br1 | 116.03(16) | C7-C6-H6 | 134.2(18)  |
| C2-C1-Br1 | 118.77(16) | C6-C7-C8 | 107.12(18) |
| C3-C2-C1  | 117.1(2)   | C6-C7-N4 | 125.84(19) |
| C3-C2-H2  | 120.0(17)  | C8-C7-N4 | 127.04(19) |
| C1-C2-H2  | 122.9(17)  | N3-C8-C7 | 110.38(19) |
| C2-C3-C4  | 120.1(2)   | N3-C8-H8 | 119.1(19)  |
| C2-C3-H3  | 118.7(18)  | C7-C8-H8 | 130.5(19)  |
| C4-C3-H3  | 121.2(19)  | C1-N1-C5 | 115.75(18) |
| C5-C4-C3  | 116.4(2)   | C6-N2-N3 | 113.33(17) |
| C5-C4-H4  | 116.5(17)  | C6-N2-C5 | 126.49(18) |
| C3-C4-H4  | 127.1(17)  | N3-N2-C5 | 120.17(17) |
| N1-C5-C4  | 125.50(19) | C8-N3-N2 | 104.49(17) |
| N1-C5-N2  | 113.51(18) | O2-N4-O1 | 124.15(18) |
| C4-C5-N2  | 120.98(18) | O2-N4-C7 | 118.60(17) |
| N2-C6-C7  | 104.66(18) | O1-N4-C7 | 117.25(18) |

**Table S18. Anisotropic displacement parameters ( $\text{\AA}^2 \times 10^3$ ) for 3. The anisotropic displacement factor exponent takes the form:  $-2\pi^2 [ h^2 a^{*2} U^{11} + \dots + 2 h k a^* b^* U^{12} ]$**

|     | U <sup>11</sup> | U <sup>22</sup> | U <sup>33</sup> | U <sup>23</sup> | U <sup>13</sup> | U <sup>12</sup> |
|-----|-----------------|-----------------|-----------------|-----------------|-----------------|-----------------|
| C1  | 15(1)           | 15(1)           | 18(1)           | -5(1)           | -4(1)           | -1(1)           |
| C2  | 21(1)           | 15(1)           | 22(1)           | -6(1)           | -5(1)           | -5(1)           |
| C3  | 19(1)           | 17(1)           | 26(1)           | -4(1)           | -5(1)           | -7(1)           |
| C4  | 17(1)           | 16(1)           | 18(1)           | -6(1)           | -3(1)           | -5(1)           |
| C5  | 14(1)           | 11(1)           | 18(1)           | -5(1)           | -6(1)           | -1(1)           |
| C6  | 13(1)           | 16(1)           | 14(1)           | -4(1)           | -2(1)           | -4(1)           |
| C7  | 14(1)           | 12(1)           | 18(1)           | -4(1)           | -2(1)           | -3(1)           |
| C8  | 16(1)           | 17(1)           | 18(1)           | -7(1)           | 0(1)            | -4(1)           |
| Br1 | 24(1)           | 18(1)           | 18(1)           | -8(1)           | -1(1)           | -2(1)           |
| N1  | 16(1)           | 14(1)           | 17(1)           | -4(1)           | -2(1)           | -2(1)           |
| N2  | 14(1)           | 14(1)           | 15(1)           | -6(1)           | -2(1)           | -3(1)           |
| N3  | 15(1)           | 18(1)           | 18(1)           | -9(1)           | 2(1)            | -3(1)           |
| N4  | 16(1)           | 14(1)           | 18(1)           | -5(1)           | -3(1)           | -4(1)           |
| O1  | 25(1)           | 23(1)           | 24(1)           | -15(1)          | 3(1)            | -10(1)          |
| O2  | 23(1)           | 22(1)           | 19(1)           | -7(1)           | 5(1)            | -10(1)          |

**Table S19. Hydrogen coordinates ( $\times 10^4$ ) and isotropic displacement parameters ( $\text{\AA}^2 \times 10^{-3}$ ) for 3.**

|    | x        | y        | z        | U(eq) |
|----|----------|----------|----------|-------|
| H2 | 6920(50) | 9060(30) | 3510(20) | 19(6) |
| H3 | 9590(60) | 8360(40) | 1800(30) | 26(7) |
| H4 | 8920(50) | 6080(40) | 990(30)  | 24(7) |
| H6 | 2370(50) | 3770(30) | 2990(30) | 17(6) |
| H8 | 6780(60) | 1950(40) | 70(30)   | 30(8) |

**Table S20. Torsion angles [°] for 3.**

---

|              |             |
|--------------|-------------|
| N1-C1-C2-C3  | -0.4(3)     |
| Br1-C1-C2-C3 | -178.97(16) |
| C1-C2-C3-C4  | 0.2(3)      |
| C2-C3-C4-C5  | -0.6(3)     |
| C3-C4-C5-N1  | 1.3(3)      |
| C3-C4-C5-N2  | -179.78(19) |
| N2-C6-C7-C8  | 0.7(2)      |
| N2-C6-C7-N4  | -178.44(19) |
| C6-C7-C8-N3  | 0.0(3)      |
| N4-C7-C8-N3  | 179.1(2)    |
| C2-C1-N1-C5  | 1.1(3)      |
| Br1-C1-N1-C5 | 179.65(14)  |
| C4-C5-N1-C1  | -1.6(3)     |
| N2-C5-N1-C1  | 179.48(18)  |
| C7-C6-N2-N3  | -1.1(2)     |
| C7-C6-N2-C5  | 178.57(19)  |
| N1-C5-N2-C6  | 1.9(3)      |
| C4-C5-N2-C6  | -177.1(2)   |
| N1-C5-N2-N3  | -178.41(17) |
| C4-C5-N2-N3  | 2.6(3)      |
| C7-C8-N3-N2  | -0.6(2)     |
| C6-N2-N3-C8  | 1.1(2)      |
| C5-N2-N3-C8  | -178.60(19) |
| C6-C7-N4-O2  | -9.2(3)     |
| C8-C7-N4-O2  | 171.9(2)    |
| C6-C7-N4-O1  | 170.3(2)    |
| C8-C7-N4-O1  | -8.6(3)     |

---

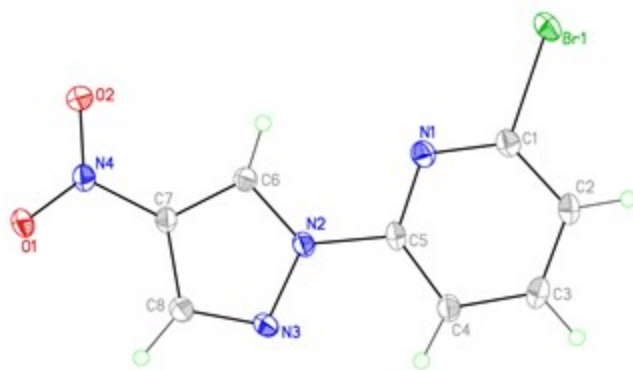

Figure S6: Single crystal structure of **3**. Displacement ellipsoids are scaled to the 50% probability level.

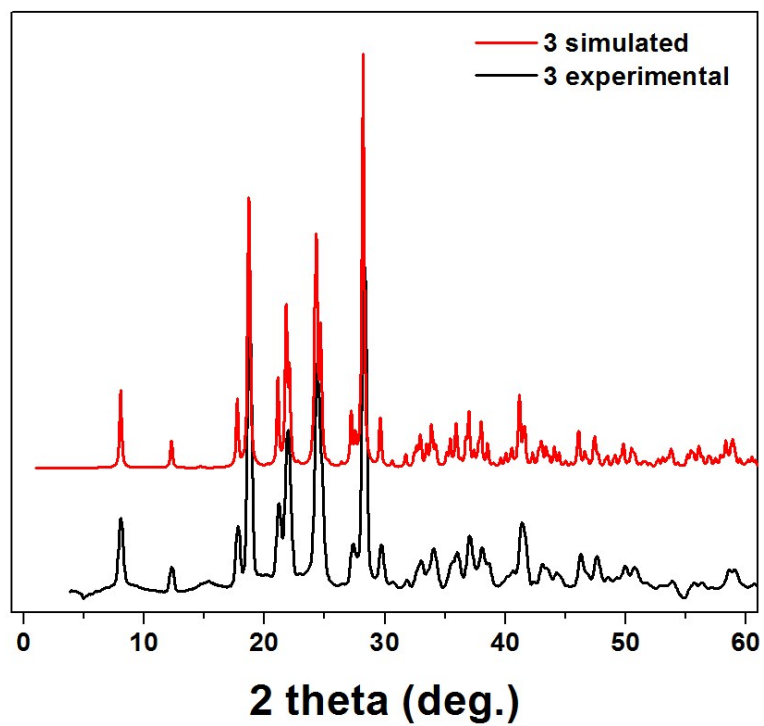

Figure S7: Experimental and simulated X-ray powder diffraction patterns of **3**.

## Notes and References:

1. CrystalClear 1.40 (2008). Rigaku Americas Corporation, The Woodlands, TX.
2. SIR2004. A program for crystal structure solution. Altomare A., Burla M.C., Caliandro, M., Camalli M., Carrozzini, B., Cascarano G.L., De Caro, L., Giacovazzo C., Polidori G., Spagna R. *J. Appl. Cryst.*, 2005, 38, 381-388.
3. Sheldrick, G. M. (2015). SHELXL-2014/7. Program for the Refinement of Crystal Structures. *Acta Cryst.*, C71, 9-18.
4. Spek, A. L. (1998). PLATON, A Multipurpose Crystallographic Tool. Utrecht University, The Netherlands.
5. WinGX 1.64. (1999). An Integrated System of Windows Programs for the Solution, Refinement and Analysis of Single Crystal X-ray Diffraction Data. Farrugia, L. J. *J. Appl. Cryst.* 32. 837-838.
6.  $R_w(F^2) = \{\sum w(|F_o|^2 - |F_c|^2)^2 / \sum w(|F_o|^4)\}^{1/2}$  where w is the weight given each reflection.  
 $R(F) = \sum(|F_o| - |F_c|) / \sum |F_o|$  for reflections with  $F_o > 4(\sigma(F_o))$ .  $S = [\sum w(|F_o|^2 - |F_c|^2)^2 / (n - p)]^{1/2}$ , where n is the number of reflections and p is the number of refined parameters.
7. International Tables for X-ray Crystallography (1992). Vol. C, Tables 4.2.6.8 and 6.1.1.4, A. J. C. Wilson, editor, Boston: Kluwer Academic Press.
8. Sheldrick, G. M. (1994). SHELXTL/PC (Version 5.03). Siemens Analytical X-ray Instruments, Inc., Madison, Wisconsin, USA.
